# Supplementary material for: A genome-wide association study of a global rice panel reveals resistance in Oryza sativa to root-knot nematodes
Source: PubMed Central journal article supplement (PMC4753847; doi:10.1093/jxb/erv470), 2015-11-09
Supplement: supp_erv470_Supplementary_figures.pdf [file supp_erv470_Supplementary_figures.pdf]

## **A genome-wide association study of a global rice panel reveals resistance in *Oryza sativa* to root-knot nematodes**

Stanley O N Dimkpa, Zobaida Lahari, Roshi Shrestha, Alex Douglas, Godelieve Gheysen, and Adam H Price

### *Supplemental File*

**Supplementary Figure 1** qq plots for all data with naïve and mixed model results, plus naïve for each of the four subpopulations. Dotted red line is the one to one line.

**Supplementary Figure 2** Epistatic interaction for gall number in the Bala x Azucena mapping population. The mean number of galls four weeks after inoculation with *M. graminicola* for all six combinations of allelic combinations of markers in order of RG409 (chromosome 3), RG650 (chromosome 7) and a1245y (chromosome 11) where A is Azucena and B is Bala. Bar is standard error. Bars that do not share the same letter above are different by Tukey's test at  $P < 0.05$ . Note this a further analysis of data first reported in Shrestha et al., (2007). A three way ANOVA with these markers as factors explains 30% of the variation for gall numbers, and significant interactions are detected between RG409 and a1245y ( $P = 0.001$ ) and between RG650 and a1245y ( $P < 0.001$ ).

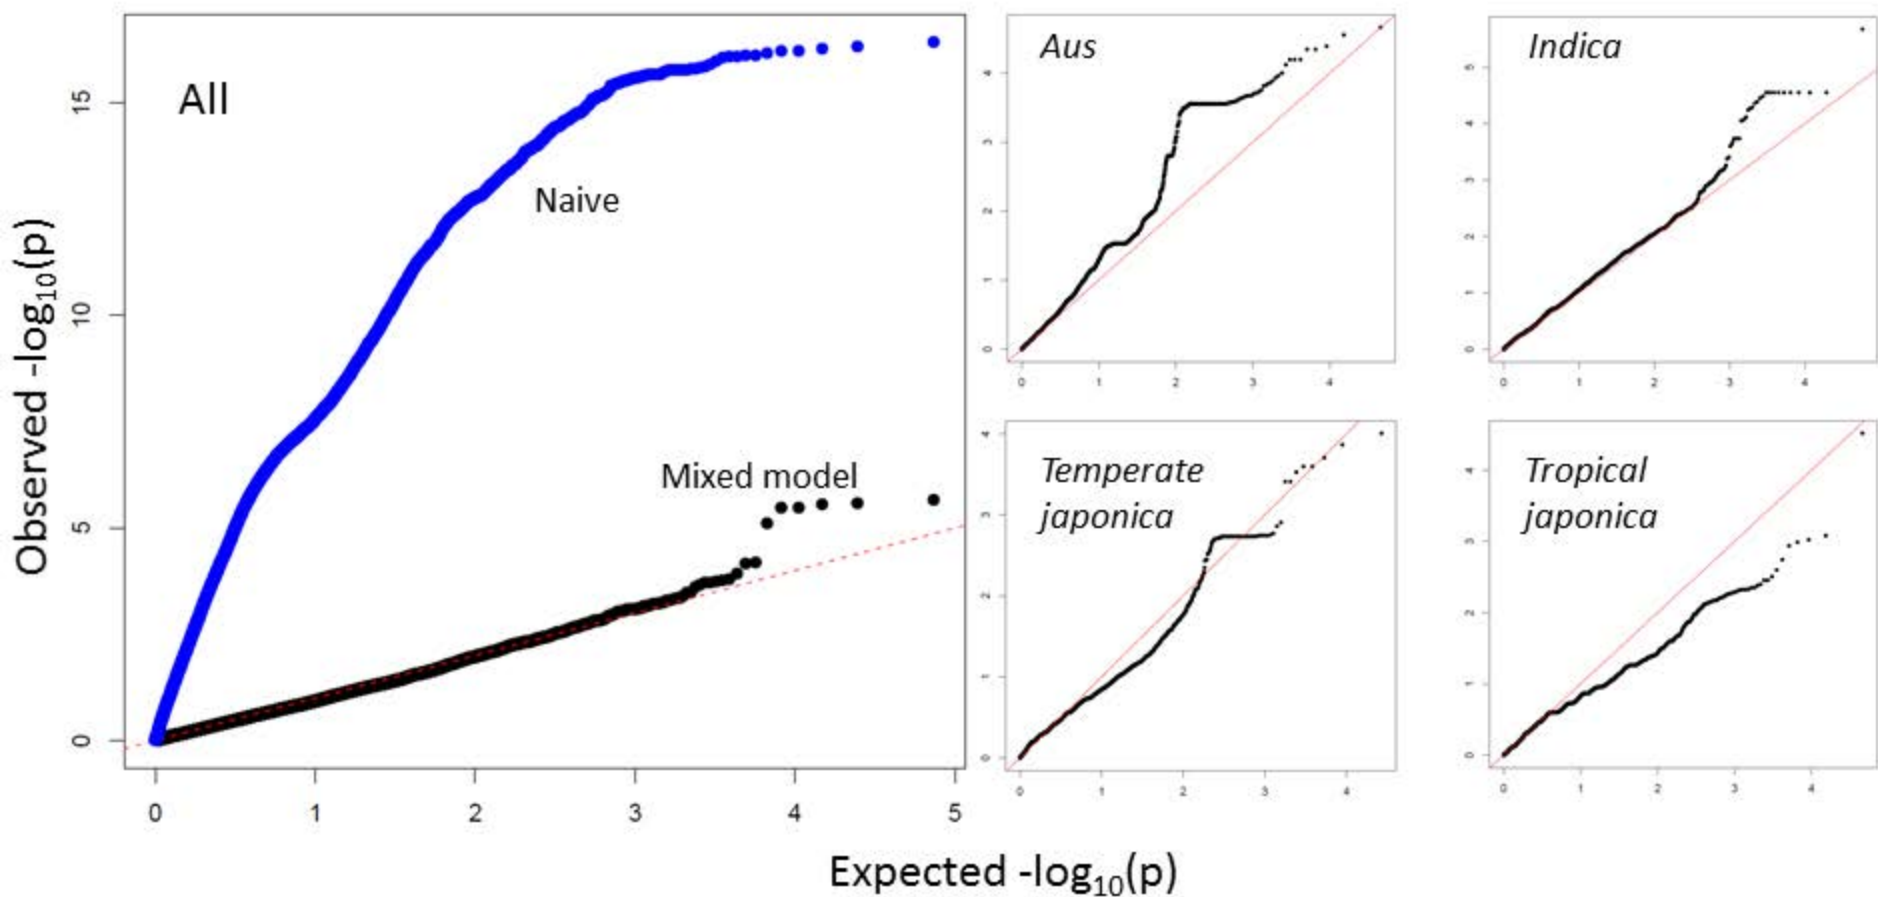

**Supplementary Figure 1** qq plots for all data with naïve and mixed model results, plus naïve for each of the four subpopulations. Dotted red line is the one to one line.

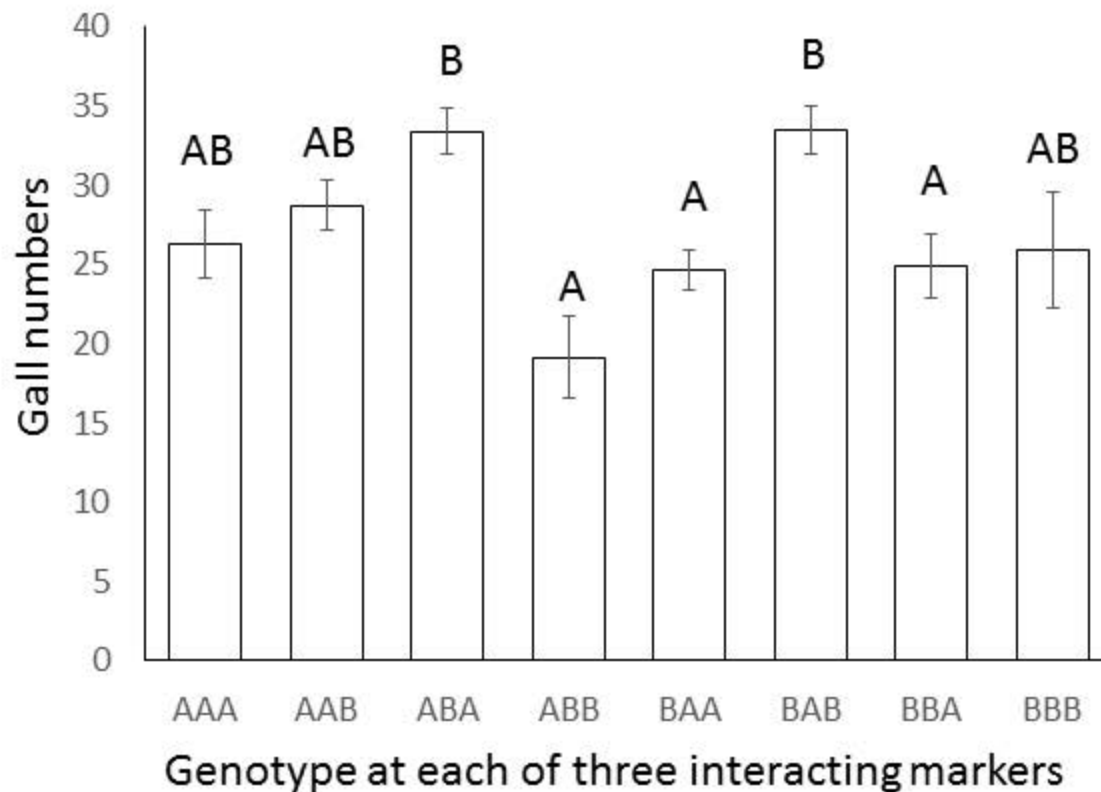

**Supplementary figure 2:** Epistatic interaction for gall number in the Bala x Azucena mapping population. The mean number of galls four weeks after inoculation with *M. graminicola* for all six combinations of allelic combinations of markers in order of RG409 (chromosome 3), RG650 (chromosome 7) and a1245y (chromosome 11) where A is Azucena and B is Bala. Bar is standard error. Bars that do not share the same letter above are different by Tukey's test at  $P < 0.05$ . Note this a further analysis of data first reported in Shrestha et al., (2007). A three way ANOVA with these markers as factors explains 30% of the variation for gall numbers, and significant interactions are detected between RG409 and a1245y ( $P = 0.001$ ) and between RG650 and a1245y ( $P < 0.001$ ).
